# Supplementary material for: The Impact of Pneumococcal Conjugate Vaccine (PCV) Coverage Heterogeneities on the Changing Epidemiology of Invasive Pneumococcal Disease in Switzerland, 2005–2019
Source: MDPI journal article supplement (doi:10.3390/microorganisms9051078), 2021-05-18

## Supplementary Material

*Table S1.* Proportions of PCV serotypes among invasive pneumococcal disease cases in Switzerland, 2005-2019

| Age category                          | Serotype proportions of IPD cases in different age group populations (%) |                   |                   |                   |                   |                   |                   |                   |                   |                   |                   |                   |                   |                   |                   |                       |
|---------------------------------------|--------------------------------------------------------------------------|-------------------|-------------------|-------------------|-------------------|-------------------|-------------------|-------------------|-------------------|-------------------|-------------------|-------------------|-------------------|-------------------|-------------------|-----------------------|
|                                       | Year                                                                     |                   |                   |                   |                   |                   |                   |                   |                   |                   |                   |                   |                   |                   |                   | <i>P</i> <sup>a</sup> |
|                                       | 2005                                                                     | 2006              | 2007              | 2008              | 2009              | 2010              | 2011              | 2012              | 2013              | 2014              | 2015              | 2016              | 2017              | 2018              | 2019              |                       |
| < 5 years                             | 45 (4.4)                                                                 | 44 (4.5)          | 33 (3.2)          | 21 (1.9)          | 11 (1)            | 9 (0.9)           | 13 (1.3)          | 2 (0.2)           | 3 (0.3)           | 4 (0.5)           | 0 (0)             | 4 (0.5)           | 3 (0.3)           | 3 (0.3)           | 1 (0.1)           | < 0.001               |
| 5-64 years                            | 160 (15.7)                                                               | 145 (14.8)        | 165 (15.9)        | 169 (15)          | 147 (13)          | 91 (9.3)          | 69 (6.8)          | 50 (5.4)          | 48 (4.9)          | 32 (3.8)          | 23 (2.6)          | 25 (2.9)          | 36 (3.6)          | 31 (3.3)          | 33 (3.6)          | < 0.001               |
| ≥65 years                             | 230 (22.6)                                                               | 248 (25.4)        | 243 (23.4)        | 230 (20.4)        | 196 (17.4)        | 134 (13.7)        | 127 (12.5)        | 85 (9.2)          | 83 (8.4)          | 68 (8)            | 61 (6.9)          | 43 (4.9)          | 41 (4.1)          | 38 (4)            | 44 (4.8)          | < 0.001               |
| Unknown                               | 29 (2.9)                                                                 | 34 (3.5)          | 26 (2.5)          | 15 (1.3)          | 12 (1.1)          | 8 (0.8)           | 10 (1)            | 7 (0.8)           | 7 (0.7)           | 9 (1.1)           | 4 (0.4)           | 5 (0.6)           | 5 (0.5)           | 1 (0.1)           | 1 (0.1)           | < 0.001               |
| <b>Total PCV7<sup>b</sup></b>         | <b>464 (45.7)</b>                                                        | <b>471 (48.2)</b> | <b>467 (45)</b>   | <b>435 (38.5)</b> | <b>366 (32.5)</b> | <b>242 (24.7)</b> | <b>219 (21.5)</b> | <b>144 (15.6)</b> | <b>141 (14.3)</b> | <b>113 (13.4)</b> | <b>88 (9.9)</b>   | <b>77 (8.8)</b>   | <b>85 (8.4)</b>   | <b>73 (7.7)</b>   | <b>79 (8.6)</b>   | <b>&lt; 0.001</b>     |
| < 5 years                             | 15 (1.5)                                                                 | 19 (1.9)          | 25 (2.4)          | 35 (3.1)          | 44 (3.9)          | 32 (3.3)          | 35 (3.4)          | 21 (2.3)          | 14 (1.4)          | 14 (1.7)          | 10 (1.1)          | 8 (0.9)           | 7 (0.7)           | 18 (1.9)          | 7 (0.8)           | < 0.001               |
| 5-64 years                            | 135 (13.3)                                                               | 117 (12)          | 147 (14.2)        | 155 (13.7)        | 203 (18)          | 179 (18.2)        | 189 (18.5)        | 158 (17.1)        | 171 (17.4)        | 99 (11.7)         | 103 (11.6)        | 80 (9.1)          | 74 (7.3)          | 79 (8.4)          | 58 (6.3)          | < 0.001               |
| ≥65 years                             | 139 (13.7)                                                               | 134 (13.7)        | 159 (15.3)        | 188 (16.7)        | 195 (17.3)        | 199 (20.3)        | 217 (21.3)        | 207 (22.4)        | 188 (19.1)        | 144 (17)          | 138 (15.5)        | 147 (16.8)        | 146 (14.4)        | 130 (13.8)        | 110 (12)          | 0.2                   |
| Unknown                               | 27 (2.7)                                                                 | 23 (2.4)          | 27 (2.6)          | 18 (1.6)          | 20 (1.8)          | 13 (1.3)          | 19 (1.9)          | 36 (3.9)          | 16 (1.6)          | 12 (1.4)          | 21 (2.4)          | 12 (1.4)          | 24 (2.4)          | 15 (1.6)          | 16 (1.7)          | 0.2                   |
| <b>Total PCV13nonPCV7<sup>c</sup></b> | <b>316 (31.1)</b>                                                        | <b>293 (30)</b>   | <b>358 (34.5)</b> | <b>396 (35.1)</b> | <b>462 (41)</b>   | <b>423 (43.1)</b> | <b>460 (45.1)</b> | <b>422 (45.7)</b> | <b>389 (39.5)</b> | <b>269 (31.8)</b> | <b>272 (30.6)</b> | <b>247 (28.2)</b> | <b>251 (24.8)</b> | <b>242 (25.6)</b> | <b>191 (20.9)</b> | <b>&lt; 0.001</b>     |
| < 5 years                             | 10 (1)                                                                   | 14 (1.4)          | 14 (1.4)          | 7 (0.6)           | 12 (1.1)          | 17 (1.7)          | 11 (1.1)          | 15 (1.6)          | 13 (1.3)          | 15 (1.8)          | 20 (2.2)          | 16 (1.8)          | 17 (1.7)          | 17 (1.8)          | 16 (1.7)          | 0.005                 |
| 5-64 years                            | 89 (8.8)                                                                 | 84 (8.6)          | 87 (8.4)          | 120 (10.6)        | 127 (11.3)        | 117 (11.9)        | 121 (11.9)        | 128 (13.9)        | 169 (17.2)        | 144 (17)          | 177 (19.9)        | 196 (22.3)        | 215 (21.2)        | 203 (21.5)        | 207 (22.6)        | < 0.001               |
| ≥65 years                             | 119 (11.7)                                                               | 95 (9.7)          | 104 (10)          | 155 (13.7)        | 149 (13.2)        | 171 (17.4)        | 187 (18.3)        | 179 (19.4)        | 245 (24.9)        | 270 (31.9)        | 292 (32.8)        | 304 (34.7)        | 391 (38.6)        | 359 (38)          | 375 (41)          | < 0.001               |
| Unknown                               | 18 (1.8)                                                                 | 21 (2.1)          | 7 (0.7)           | 16 (1.4)          | 11 (1)            | 11 (1.1)          | 22 (2.2)          | 36 (3.9)          | 28 (2.8)          | 35 (4.1)          | 40 (4.5)          | 37 (4.2)          | 53 (5.2)          | 50 (5.3)          | 47 (5.1)          | < 0.001               |
| <b>Total Non-PCV<sup>d</sup></b>      | <b>236 (23.2)</b>                                                        | <b>214 (21.9)</b> | <b>212 (20.4)</b> | <b>298 (26.4)</b> | <b>299 (26.4)</b> | <b>316 (32.2)</b> | <b>341 (33.4)</b> | <b>358 (38.7)</b> | <b>455 (46.2)</b> | <b>464 (54.8)</b> | <b>529 (59.5)</b> | <b>553 (63.1)</b> | <b>676 (66.8)</b> | <b>629 (66.6)</b> | <b>645 (70.5)</b> | <b>&lt; 0.001</b>     |
| <b>All cases</b>                      | <b>1016 (100)</b>                                                        | <b>978 (100)</b>  | <b>1037 (100)</b> | <b>1129 (100)</b> | <b>1127 (100)</b> | <b>981 (100)</b>  | <b>1020 (100)</b> | <b>924 (100)</b>  | <b>985 (100)</b>  | <b>846 (100)</b>  | <b>889 (100)</b>  | <b>877 (100)</b>  | <b>1012 (100)</b> | <b>944 (100)</b>  | <b>915 (100)</b>  |                       |

a *P*-values for chi-squared test of trend. *P* < 0.05 indicated in bold.

b Serotypes included in PCV7: 4, 6B, 9V, 14, 18C, 19F & 23F

c Additional serotypes included in PCV13, but not PCV7: 1, 3, 5, 6A, 7F & 19A

d Serotypes not included in either PCV7 or PCV13

Table S2. Overall incidence of serotypes among IPD cases in Switzerland, 2005-2019

| Serotype/<br>serogroup <sup>a</sup> | Incidence of serotypes/serogroups among IPD cases in Switzerland (Cases per 100'000 population) |                 |                    |                    |                    |                   |                    |                   |                   |                   |                   |                   |                    |                 |                   |
|-------------------------------------|-------------------------------------------------------------------------------------------------|-----------------|--------------------|--------------------|--------------------|-------------------|--------------------|-------------------|-------------------|-------------------|-------------------|-------------------|--------------------|-----------------|-------------------|
|                                     | Year                                                                                            |                 |                    |                    |                    |                   |                    |                   |                   |                   |                   |                   |                    |                 |                   |
|                                     | 2005                                                                                            | 2006            | 2007               | 2008               | 2009               | 2010              | 2011               | 2012              | 2013              | 2014              | 2015              | 2016              | 2017               | 2018            | 2019              |
| <b>4</b>                            | 77 (1)                                                                                          | 81 (1.1)        | 67 (0.9)           | 79 (1)             | 79 (1)             | 51 (0.6)          | 48 (0.6)           | 32 (0.4)          | 27 (0.3)          | 21 (0.3)          | 18 (0.2)          | 19 (0.2)          | 21 (0.2)           | 13 (0.2)        | 8 (0.1)           |
| <b>6B</b>                           | 48 (0.6)                                                                                        | 38 (0.5)        | 32 (0.4)           | 26 (0.3)           | 27 (0.3)           | 16 (0.2)          | 22 (0.3)           | 11 (0.1)          | 7 (0.1)           | 7 (0.1)           | 4 (0)             | 5 (0.1)           | 9 (0.1)            | 4 (0)           | 4 (0)             |
| <b>9V</b>                           | 73 (1)                                                                                          | 57 (0.8)        | 77 (1)             | 68 (0.9)           | 58 (0.7)           | 29 (0.4)          | 19 (0.2)           | 13 (0.2)          | 19 (0.2)          | 6 (0.1)           | 7 (0.1)           | 7 (0.1)           | 6 (0.1)            | 8 (0.1)         | 12 (0.1)          |
| <b>14</b>                           | 136 (1.8)                                                                                       | 151 (2)         | 142 (1.9)          | 111 (1.4)          | 88 (1.1)           | 66 (0.8)          | 56 (0.7)           | 30 (0.4)          | 39 (0.5)          | 37 (0.4)          | 29 (0.3)          | 19 (0.2)          | 17 (0.2)           | 19 (0.2)        | 22 (0.3)          |
| <b>18C</b>                          | 25 (0.3)                                                                                        | 35 (0.5)        | 39 (0.5)           | 30 (0.4)           | 19 (0.2)           | 23 (0.3)          | 17 (0.2)           | 10 (0.1)          | 9 (0.1)           | 12 (0.1)          | 4 (0)             | 4 (0)             | 1 (0)              | 6 (0.1)         | 8 (0.1)           |
| <b>19F</b>                          | 44 (0.6)                                                                                        | 49 (0.7)        | 50 (0.7)           | 48 (0.6)           | 34 (0.4)           | 29 (0.4)          | 29 (0.4)           | 17 (0.2)          | 27 (0.3)          | 21 (0.3)          | 16 (0.2)          | 20 (0.2)          | 27 (0.3)           | 18 (0.2)        | 23 (0.3)          |
| <b>23F</b>                          | 61 (0.8)                                                                                        | 60 (0.8)        | 60 (0.8)           | 73 (0.9)           | 61 (0.8)           | 28 (0.4)          | 28 (0.4)           | 31 (0.4)          | 13 (0.2)          | 9 (0.1)           | 10 (0.1)          | 3 (0)             | 4 (0)              | 5 (0.1)         | 2 (0)             |
| <b>1</b>                            | 60 (0.8)                                                                                        | 40 (0.5)        | 37 (0.5)           | 50 (0.6)           | 49 (0.6)           | 57 (0.7)          | 49 (0.6)           | 41 (0.5)          | 26 (0.3)          | 24 (0.3)          | 6 (0.1)           | 5 (0.1)           | 3 (0)              | 0 (0)           | 1 (0)             |
| <b>3</b>                            | 121 (1.6)                                                                                       | 108 (1.4)       | 135 (1.8)          | 151 (2)            | 162 (2.1)          | 126 (1.6)         | 168 (2.1)          | 137 (1.7)         | 163 (2)           | 131 (1.6)         | 151 (1.8)         | 163 (1.9)         | 158 (1.9)          | 187 (2.2)       | 149 (1.7)         |
| <b>6A</b>                           | 20 (0.3)                                                                                        | 40 (0.5)        | 36 (0.5)           | 37 (0.5)           | 45 (0.6)           | 30 (0.4)          | 20 (0.3)           | 24 (0.3)          | 18 (0.2)          | 18 (0.2)          | 11 (0.1)          | 7 (0.1)           | 5 (0.1)            | 4 (0)           | 4 (0)             |
| <b>7F</b>                           | 83 (1.1)                                                                                        | 80 (1.1)        | 98 (1.3)           | 99 (1.3)           | 115 (1.5)          | 109 (1.4)         | 106 (1.3)          | 99 (1.2)          | 96 (1.2)          | 43 (0.5)          | 37 (0.4)          | 26 (0.3)          | 22 (0.3)           | 9 (0.1)         | 6 (0.1)           |
| <b>19A</b>                          | 30 (0.4)                                                                                        | 24 (0.3)        | 43 (0.6)           | 49 (0.6)           | 79 (1)             | 99 (1.3)          | 116 (1.5)          | 119 (1.5)         | 82 (1)            | 50 (0.6)          | 66 (0.8)          | 46 (0.5)          | 63 (0.7)           | 42 (0.5)        | 31 (0.4)          |
| <b>10A</b>                          | 0 (0)                                                                                           | 0 (0)           | 1 (0)              | 1 (0)              | 1 (0)              | 9 (0.1)           | 16 (0.2)           | 15 (0.2)          | 19 (0.2)          | 20 (0.2)          | 22 (0.3)          | 23 (0.3)          | 24 (0.3)           | 25 (0.3)        | 30 (0.3)          |
| <b>11A</b>                          | 0 (0)                                                                                           | 0 (0)           | 0 (0)              | 3 (0)              | 2 (0)              | 13 (0.2)          | 23 (0.3)           | 15 (0.2)          | 18 (0.2)          | 25 (0.3)          | 22 (0.3)          | 20 (0.2)          | 27 (0.3)           | 24 (0.3)        | 19 (0.2)          |
| <b>12F</b>                          | 0 (0)                                                                                           | 0 (0)           | 3 (0)              | 11 (0.1)           | 9 (0.1)            | 5 (0.1)           | 8 (0.1)            | 16 (0.2)          | 17 (0.2)          | 19 (0.2)          | 21 (0.3)          | 25 (0.3)          | 29 (0.3)           | 37 (0.4)        | 48 (0.6)          |
| <b>15B/C</b>                        | 0 (0)                                                                                           | 1 (0)           | 11 (0.1)           | 10 (0.1)           | 15 (0.2)           | 14 (0.2)          | 11 (0.1)           | 17 (0.2)          | 13 (0.2)          | 20 (0.2)          | 19 (0.2)          | 23 (0.3)          | 24 (0.3)           | 25 (0.3)        | 1 (0)             |
| <b>15A</b>                          | 0 (0)                                                                                           | 0 (0)           | 0 (0)              | 9 (0.1)            | 5 (0.1)            | 5 (0.1)           | 10 (0.1)           | 8 (0.1)           | 10 (0.1)          | 20 (0.2)          | 20 (0.2)          | 24 (0.3)          | 31 (0.4)           | 27 (0.3)        | 29 (0.3)          |
| <b>20</b>                           | 4 (0.1)                                                                                         | 3 (0)           | 8 (0.1)            | 14 (0.2)           | 10 (0.1)           | 9 (0.1)           | 10 (0.1)           | 6 (0.1)           | 8 (0.1)           | 6 (0.1)           | 21 (0.3)          | 10 (0.1)          | 17 (0.2)           | 13 (0.2)        | 12 (0.1)          |
| <b>22F</b>                          | 0 (0)                                                                                           | 0 (0)           | 30 (0.4)           | 33 (0.4)           | 45 (0.6)           | 61 (0.8)          | 62 (0.8)           | 54 (0.7)          | 85 (1)            | 92 (1.1)          | 66 (0.8)          | 85 (1)            | 91 (1.1)           | 86 (1)          | 103 (1.2)         |
| <b>23A</b>                          | 0 (0)                                                                                           | 1 (0)           | 4 (0.1)            | 11 (0.1)           | 12 (0.2)           | 8 (0.1)           | 11 (0.1)           | 11 (0.1)          | 17 (0.2)          | 24 (0.3)          | 19 (0.2)          | 16 (0.2)          | 27 (0.3)           | 20 (0.2)        | 29 (0.3)          |
| <b>23B</b>                          | 0 (0)                                                                                           | 0 (0)           | 4 (0.1)            | 6 (0.1)            | 3 (0)              | 8 (0.1)           | 8 (0.1)            | 13 (0.2)          | 23 (0.3)          | 22 (0.3)          | 33 (0.4)          | 20 (0.2)          | 39 (0.5)           | 33 (0.4)        | 23 (0.3)          |
| <b>24</b>                           | 2 (0)                                                                                           | 1 (0)           | 10 (0.1)           | 5 (0.1)            | 9 (0.1)            | 3 (0)             | 7 (0.1)            | 15 (0.2)          | 22 (0.3)          | 25 (0.3)          | 42 (0.5)          | 31 (0.4)          | 15 (0.2)           | 13 (0.2)        | 0 (0)             |
| <b>35F</b>                          | 0 (0)                                                                                           | 0 (0)           | 6 (0.1)            | 7 (0.1)            | 8 (0.1)            | 17 (0.2)          | 4 (0.1)            | 15 (0.2)          | 18 (0.2)          | 14 (0.2)          | 20 (0.2)          | 16 (0.2)          | 15 (0.2)           | 16 (0.2)        | 20 (0.2)          |
| <b>6C</b>                           | 0 (0)                                                                                           | 0 (0)           | 4 (0.1)            | 8 (0.1)            | 12 (0.2)           | 21 (0.3)          | 23 (0.3)           | 16 (0.2)          | 40 (0.5)          | 10 (0.1)          | 26 (0.3)          | 20 (0.2)          | 22 (0.3)           | 15 (0.2)        | 13 (0.2)          |
| <b>8</b>                            | 57 (0.8)                                                                                        | 57 (0.8)        | 32 (0.4)           | 50 (0.6)           | 51 (0.7)           | 45 (0.6)          | 60 (0.8)           | 53 (0.7)          | 66 (0.8)          | 60 (0.7)          | 89 (1.1)          | 107 (1.3)         | 150 (1.8)          | 160 (1.9)       | 142 (1.7)         |
| <b>9N</b>                           | 0 (0)                                                                                           | 0 (0)           | 27 (0.4)           | 41 (0.5)           | 26 (0.3)           | 32 (0.4)          | 32 (0.4)           | 33 (0.4)          | 31 (0.4)          | 31 (0.4)          | 32 (0.4)          | 55 (0.7)          | 64 (0.8)           | 50 (0.6)        | 63 (0.7)          |
| <b>others<sup>b</sup></b>           | 175 (2.3)                                                                                       | 152 (2)         | 81 (1.1)           | 99 (1.3)           | 103 (1.3)          | 68 (0.9)          | 57 (0.7)           | 73 (0.9)          | 72 (0.9)          | 79 (1)            | 78 (0.9)          | 78 (0.9)          | 101 (1.2)          | 85 (1)          | 113 (1.3)         |
| <b>Total</b>                        | <b>1016 (13.6)</b>                                                                              | <b>978 (13)</b> | <b>1037 (13.7)</b> | <b>1129 (14.7)</b> | <b>1127 (14.5)</b> | <b>981 (12.5)</b> | <b>1020 (12.8)</b> | <b>924 (11.5)</b> | <b>985 (12.1)</b> | <b>846 (10.3)</b> | <b>889 (10.7)</b> | <b>877 (10.4)</b> | <b>1012 (11.9)</b> | <b>944 (11)</b> | <b>915 (10.6)</b> |

a Serotypes/serogroups with proportions  $\geq 1\%$  are highlighted as such: PCV7 in peach, additional serotypes included in PCV13, but not PCV7 are in blue and non-PCV serotypes are in gray.

b Serotypes/serogroups with proportions  $< 1\%$  were classified as others irrespective of PCV type.

Table S3. Incidence of invasive pneumococcal disease cases in children below 5 years by region and PCV serotypes, Switzerland 2005-2019

| Children <5 years                                                                                                                                                                                                                                                                                                                                                                                                                                                                                                                                                      | IPD cases-<br>East | IPD cases-<br>West | Incidence<br>(per 100'000)<br>East | Incidence<br>(per 100'000)<br>West | IRR- West<br>vs. East | 95% CI           |
|------------------------------------------------------------------------------------------------------------------------------------------------------------------------------------------------------------------------------------------------------------------------------------------------------------------------------------------------------------------------------------------------------------------------------------------------------------------------------------------------------------------------------------------------------------------------|--------------------|--------------------|------------------------------------|------------------------------------|-----------------------|------------------|
| <b>2005-2007 (early PCV7 era)</b>                                                                                                                                                                                                                                                                                                                                                                                                                                                                                                                                      |                    |                    |                                    |                                    |                       |                  |
| PCV7                                                                                                                                                                                                                                                                                                                                                                                                                                                                                                                                                                   | 85                 | 37                 | 11.2                               | 10.9                               | 0.97                  | 0.66-1.43        |
| PCV13nonPCV7                                                                                                                                                                                                                                                                                                                                                                                                                                                                                                                                                           | 47                 | 12                 | 6.2                                | 3.5                                | 0.57                  | 0.30-1.07        |
| Non-PCV                                                                                                                                                                                                                                                                                                                                                                                                                                                                                                                                                                | 33                 | 5                  | 4.3                                | 1.5                                | <b>0.34</b>           | <b>0.13-0.87</b> |
| Total cases                                                                                                                                                                                                                                                                                                                                                                                                                                                                                                                                                            | 165                | 54                 | 21.7                               | 15.8                               | <b>0.73</b>           | <b>0.54-0.99</b> |
| <b>2008-2010 (late PCV7 era)</b>                                                                                                                                                                                                                                                                                                                                                                                                                                                                                                                                       |                    |                    |                                    |                                    |                       |                  |
| PCV7                                                                                                                                                                                                                                                                                                                                                                                                                                                                                                                                                                   | 34                 | 7                  | 4.3                                | 2                                  | 0.46                  | 0.20-1.04        |
| PCV13nonPCV7                                                                                                                                                                                                                                                                                                                                                                                                                                                                                                                                                           | 72                 | 39                 | 9.1                                | 11                                 | 1.21                  | 0.82-1.79        |
| Non-PCV                                                                                                                                                                                                                                                                                                                                                                                                                                                                                                                                                                | 22                 | 14                 | 2.8                                | 3.9                                | 1.42                  | 0.73-2.78        |
| Total cases                                                                                                                                                                                                                                                                                                                                                                                                                                                                                                                                                            | 128                | 60                 | 16.1                               | 16.9                               | 1.05                  | 0.77-1.42        |
| <b>2011-2013 (early PCV13 era)</b>                                                                                                                                                                                                                                                                                                                                                                                                                                                                                                                                     |                    |                    |                                    |                                    |                       |                  |
| PCV7                                                                                                                                                                                                                                                                                                                                                                                                                                                                                                                                                                   | 11                 | 7                  | 1.3                                | 1.9                                | 1.45                  | 0.56-3.74        |
| PCV13nonPCV7                                                                                                                                                                                                                                                                                                                                                                                                                                                                                                                                                           | 55                 | 15                 | 6.5                                | 4                                  | 0.62                  | 0.35-1.10        |
| Non-PCV                                                                                                                                                                                                                                                                                                                                                                                                                                                                                                                                                                | 27                 | 12                 | 3.2                                | 3.2                                | 1.01                  | 0.51-2.00        |
| Total cases                                                                                                                                                                                                                                                                                                                                                                                                                                                                                                                                                            | 93                 | 34                 | 11                                 | 9.2                                | 0.83                  | 0.56-1.23        |
| <b>2014-2016 (mid PCV13 era)</b>                                                                                                                                                                                                                                                                                                                                                                                                                                                                                                                                       |                    |                    |                                    |                                    |                       |                  |
| PCV7                                                                                                                                                                                                                                                                                                                                                                                                                                                                                                                                                                   | 6                  | 2                  | 0.7                                | 0.5                                | 0.77                  | 0.16-3.82        |
| PCV13nonPCV7                                                                                                                                                                                                                                                                                                                                                                                                                                                                                                                                                           | 28                 | 4                  | 3.2                                | 1                                  | <b>0.33</b>           | <b>0.12-0.94</b> |
| Non-PCV                                                                                                                                                                                                                                                                                                                                                                                                                                                                                                                                                                | 39                 | 12                 | 4.4                                | 3.1                                | 0.71                  | 0.37-1.36        |
| Total cases                                                                                                                                                                                                                                                                                                                                                                                                                                                                                                                                                            | 73                 | 18                 | 8.2                                | 4.7                                | <b>0.57</b>           | <b>0.34-0.96</b> |
| <b>2017-2019 (late PCV13 era)</b>                                                                                                                                                                                                                                                                                                                                                                                                                                                                                                                                      |                    |                    |                                    |                                    |                       |                  |
| PCV7                                                                                                                                                                                                                                                                                                                                                                                                                                                                                                                                                                   | 5                  | 2                  | 0.5                                | 0.5                                | 0.94                  | 0.18-4.86        |
| PCV13nonPCV7                                                                                                                                                                                                                                                                                                                                                                                                                                                                                                                                                           | 30                 | 2                  | 3.3                                | 0.5                                | <b>0.16</b>           | <b>0.04-0.66</b> |
| Non-PCV                                                                                                                                                                                                                                                                                                                                                                                                                                                                                                                                                                | 36                 | 14                 | 3.9                                | 3.6                                | 0.92                  | 0.50-1.70        |
| Total cases                                                                                                                                                                                                                                                                                                                                                                                                                                                                                                                                                            | 71                 | 18                 | 7.7                                | 4.6                                | 0.60                  | 0.36-1.00        |
| <p>West region was defined as primarily French &amp; Italian speaking cantons: Jura (JU), Geneva (GE), Fribourg (FR), Neuchâtel (NE), Valais (VS), Vaud (VD) &amp; Ticino (TI). All other cantons were defined as East. IRR= Incidence rate ratio. Significant changes in IRR are in bold. Serotypes included in PCV7: 4, 6B, 9V, 14, 18C, 19F &amp; 23F. Additional serotypes included in PCV13, but not PCV7: 1, 3, 5, 6A, 7F &amp; 19A. Serotypes not included in either PCV7 or PCV13 were designated as Non-PCV. For 13 isolates/cases, regions were unknown.</p> |                    |                    |                                    |                                    |                       |                  |

Table S4. Incidence of invasive pneumococcal disease cases in age group 5-64 years by region and PCV serotypes, Switzerland 2005-2019

| 5-64 years                         | IPD cases-<br>East | IPD cases-<br>West | Incidence<br>(per 100'000)<br>East | Incidence<br>(per 100'000)<br>West | IRR- West<br>vs. East | 95% CI           |
|------------------------------------|--------------------|--------------------|------------------------------------|------------------------------------|-----------------------|------------------|
| <b>2005-2007 (early PCV7 era)</b>  |                    |                    |                                    |                                    |                       |                  |
| PCV7                               | 323                | 147                | 2.6                                | 2.8                                | 1.09                  | 0.90-1.33        |
| PCV13nonPCV7                       | 281                | 117                | 2.2                                | 2.2                                | 1.00                  | 0.81-1.24        |
| Non-PCV                            | 189                | 71                 | 1.5                                | 1.4                                | 0.90                  | 0.69-1.18        |
| Total cases                        | 793                | 335                | 6.3                                | 6.4                                | 1.01                  | 0.89-1.15        |
| <b>2008-2010 (late PCV7 era)</b>   |                    |                    |                                    |                                    |                       |                  |
| PCV7                               | 312                | 94                 | 2.4                                | 1.7                                | <b>0.71</b>           | <b>0.57-0.90</b> |
| PCV13nonPCV7                       | 401                | 135                | 3.1                                | 2.5                                | <b>0.80</b>           | <b>0.66-0.97</b> |
| Non-PCV                            | 251                | 115                | 2.0                                | 2.1                                | 1.08                  | 0.87-1.35        |
| Total cases                        | 964                | 344                | 7.5                                | 6.3                                | <b>0.84</b>           | <b>0.75-0.95</b> |
| <b>2011-2013 (early PCV13 era)</b> |                    |                    |                                    |                                    |                       |                  |
| PCV7                               | 121                | 46                 | 0.9                                | 0.8                                | 0.89                  | 0.63-1.25        |
| PCV13nonPCV7                       | 375                | 143                | 2.9                                | 2.6                                | 0.89                  | 0.74-1.08        |
| Non-PCV                            | 297                | 121                | 2.3                                | 2.2                                | 0.95                  | 0.77-1.18        |
| Total cases                        | 793                | 310                | 6                                  | 5.5                                | 0.92                  | 0.80-1.04        |
| <b>2014-2016 (mid PCV13 era)</b>   |                    |                    |                                    |                                    |                       |                  |
| PCV7                               | 69                 | 11                 | 0.5                                | 0.2                                | <b>0.37</b>           | <b>0.20-0.70</b> |
| PCV13nonPCV7                       | 206                | 76                 | 1.5                                | 1.3                                | 0.85                  | 0.66-1.11        |
| Non-PCV                            | 385                | 132                | 2.9                                | 2.3                                | <b>0.79</b>           | <b>0.65-0.97</b> |
| Total cases                        | 660                | 219                | 4.9                                | 3.8                                | <b>0.77</b>           | <b>0.66-0.89</b> |
| <b>2017-2019 (late PCV13 era)</b>  |                    |                    |                                    |                                    |                       |                  |
| PCV7                               | 88                 | 12                 | 0.6                                | 0.2                                | <b>0.31</b>           | <b>0.17-0.58</b> |
| PCV13nonPCV7                       | 160                | 51                 | 1.2                                | 0.9                                | 0.74                  | 0.54-1.01        |
| Non-PCV                            | 467                | 155                | 3.4                                | 2.6                                | <b>0.77</b>           | <b>0.64-0.92</b> |
| Total cases                        | 715                | 218                | 5.2                                | 3.7                                | <b>0.70</b>           | <b>0.61-0.82</b> |

West region was defined as primarily French & Italian speaking cantons: Jura (JU), Geneva (GE), Fribourg (FR), Neuchâtel (NE), Valais (VS), Vaud (VD) & Ticino (TI). All other cantons were defined as East. IRR= Incidence rate ratio. Significant changes in IRR are in bold. Serotypes included in PCV7: 4, 6B, 9V, 14, 18C, 19F & 23F. Additional serotypes included in PCV13, but not PCV7: 1, 3, 5, 6A, 7F & 19A. Serotypes not included in either PCV7 or PCV13 were designated as Non-PCV. For 13 isolates/cases, regions were unknown.

Table S5. Incidence of invasive pneumococcal disease cases in adults ≥ 65 years by region and PCV serotypes, Switzerland 2005-2019

| ≥65 years                                                                                                                                                                                                                                                                                                                                                                                                                                                                                                                                                              | IPD cases-<br>East | IPD cases-<br>West | Incidence<br>(per 100'000)<br>East | Incidence<br>(per 100'000)<br>West | IRR- West<br>vs. East | 95% CI           |
|------------------------------------------------------------------------------------------------------------------------------------------------------------------------------------------------------------------------------------------------------------------------------------------------------------------------------------------------------------------------------------------------------------------------------------------------------------------------------------------------------------------------------------------------------------------------|--------------------|--------------------|------------------------------------|------------------------------------|-----------------------|------------------|
| <b>2005-2007 (early PCV7 era)</b>                                                                                                                                                                                                                                                                                                                                                                                                                                                                                                                                      |                    |                    |                                    |                                    |                       |                  |
| PCV7                                                                                                                                                                                                                                                                                                                                                                                                                                                                                                                                                                   | 549                | 171                | 21.2                               | 16.1                               | <b>0.76</b>           | <b>0.64-0.91</b> |
| PCV13nonPCV7                                                                                                                                                                                                                                                                                                                                                                                                                                                                                                                                                           | 316                | 115                | 12.2                               | 10.9                               | 0.89                  | 0.72-1.10        |
| Non-PCV                                                                                                                                                                                                                                                                                                                                                                                                                                                                                                                                                                | 218                | 100                | 8.4                                | 9.4                                | 1.12                  | 0.89-1.42        |
| <b>Total cases</b>                                                                                                                                                                                                                                                                                                                                                                                                                                                                                                                                                     | <b>1083</b>        | <b>386</b>         | <b>41.7</b>                        | <b>36.4</b>                        | <b>0.87</b>           | <b>0.78-0.98</b> |
| <b>2008-2010 (late PCV7 era)</b>                                                                                                                                                                                                                                                                                                                                                                                                                                                                                                                                       |                    |                    |                                    |                                    |                       |                  |
| PCV7                                                                                                                                                                                                                                                                                                                                                                                                                                                                                                                                                                   | 449                | 108                | 16.1                               | 9.4                                | <b>0.58</b>           | <b>0.47-0.72</b> |
| PCV13nonPCV7                                                                                                                                                                                                                                                                                                                                                                                                                                                                                                                                                           | 439                | 143                | 15.8                               | 12.5                               | <b>0.79</b>           | <b>0.66-0.96</b> |
| Non-PCV                                                                                                                                                                                                                                                                                                                                                                                                                                                                                                                                                                | 348                | 129                | 12.5                               | 11.3                               | 0.90                  | 0.74-1.10        |
| <b>Total cases</b>                                                                                                                                                                                                                                                                                                                                                                                                                                                                                                                                                     | <b>1236</b>        | <b>380</b>         | <b>44.4</b>                        | <b>33.2</b>                        | <b>0.75</b>           | <b>0.67-0.84</b> |
| <b>2011-2013 (early PCV13 era)</b>                                                                                                                                                                                                                                                                                                                                                                                                                                                                                                                                     |                    |                    |                                    |                                    |                       |                  |
| PCV7                                                                                                                                                                                                                                                                                                                                                                                                                                                                                                                                                                   | 218                | 77                 | 7.3                                | 6.3                                | 0.85                  | 0.66-1.11        |
| PCV13nonPCV7                                                                                                                                                                                                                                                                                                                                                                                                                                                                                                                                                           | 443                | 169                | 14.9                               | 13.7                               | 0.92                  | 0.77-1.10        |
| Non-PCV                                                                                                                                                                                                                                                                                                                                                                                                                                                                                                                                                                | 425                | 186                | 14.3                               | 15.1                               | 1.06                  | 0.89-1.26        |
| <b>Total cases</b>                                                                                                                                                                                                                                                                                                                                                                                                                                                                                                                                                     | <b>1086</b>        | <b>432</b>         | <b>36.6</b>                        | <b>35.1</b>                        | <b>0.96</b>           | <b>0.86-1.07</b> |
| <b>2014-2016 (mid PCV13 era)</b>                                                                                                                                                                                                                                                                                                                                                                                                                                                                                                                                       |                    |                    |                                    |                                    |                       |                  |
| PCV7                                                                                                                                                                                                                                                                                                                                                                                                                                                                                                                                                                   | 139                | 33                 | 4.4                                | 2.5                                | <b>0.57</b>           | <b>0.39-0.83</b> |
| PCV13nonPCV7                                                                                                                                                                                                                                                                                                                                                                                                                                                                                                                                                           | 331                | 98                 | 10.5                               | 7.4                                | <b>0.71</b>           | <b>0.57-0.89</b> |
| Non-PCV                                                                                                                                                                                                                                                                                                                                                                                                                                                                                                                                                                | 632                | 234                | 20                                 | 17.8                               | 0.89                  | 0.77-1.03        |
| <b>Total cases</b>                                                                                                                                                                                                                                                                                                                                                                                                                                                                                                                                                     | <b>1102</b>        | <b>365</b>         | <b>34.8</b>                        | <b>27.7</b>                        | <b>0.80</b>           | <b>0.71-0.90</b> |
| <b>2017-2019 (late PCV13 era)</b>                                                                                                                                                                                                                                                                                                                                                                                                                                                                                                                                      |                    |                    |                                    |                                    |                       |                  |
| PCV7                                                                                                                                                                                                                                                                                                                                                                                                                                                                                                                                                                   | 96                 | 27                 | 2.9                                | 2.0                                | 0.68                  | 0.45-1.05        |
| PCV13nonPCV7                                                                                                                                                                                                                                                                                                                                                                                                                                                                                                                                                           | 308                | 77                 | 9.2                                | 5.6                                | <b>0.61</b>           | <b>0.47-0.78</b> |
| Non-PCV                                                                                                                                                                                                                                                                                                                                                                                                                                                                                                                                                                | 852                | 270                | 25.4                               | 19.6                               | <b>0.77</b>           | <b>0.67-0.88</b> |
| <b>Total cases</b>                                                                                                                                                                                                                                                                                                                                                                                                                                                                                                                                                     | <b>1256</b>        | <b>374</b>         | <b>37.5</b>                        | <b>27.1</b>                        | <b>0.72</b>           | <b>0.65-0.81</b> |
| <p>West region was defined as primarily French &amp; Italian speaking cantons: Jura (JU), Geneva (GE), Fribourg (FR), Neuchâtel (NE), Valais (VS), Vaud (VD) &amp; Ticino (TI). All other cantons were defined as East. IRR= Incidence rate ratio. Significant changes in IRR are in bold. Serotypes included in PCV7: 4, 6B, 9V, 14, 18C, 19F &amp; 23F. Additional serotypes included in PCV13, but not PCV7: 1, 3, 5, 6A, 7F &amp; 19A. Serotypes not included in either PCV7 or PCV13 were designated as Non-PCV. For 13 isolates/cases, regions were unknown.</p> |                    |                    |                                    |                                    |                       |                  |

Table S6. Incidence of serotypes among IPD cases in eastern Switzerland, 2005-2019

| Serotype/<br>serogroup <sup>a</sup> | Incidence of serotypes/serogroups among IPD cases in the East <sup>b</sup> (Cases per 100'000 population) |                 |                   |                   |                   |                   |                   |                 |                   |                   |                   |                   |                   |                   |                   |
|-------------------------------------|-----------------------------------------------------------------------------------------------------------|-----------------|-------------------|-------------------|-------------------|-------------------|-------------------|-----------------|-------------------|-------------------|-------------------|-------------------|-------------------|-------------------|-------------------|
|                                     | Year                                                                                                      |                 |                   |                   |                   |                   |                   |                 |                   |                   |                   |                   |                   |                   |                   |
|                                     | 2005                                                                                                      | 2006            | 2007              | 2008              | 2009              | 2010              | 2011              | 2012            | 2013              | 2014              | 2015              | 2016              | 2017              | 2018              | 2019              |
| <b>4</b>                            | 57 (1.1)                                                                                                  | 49 (0.9)        | 47 (0.9)          | 59 (1.1)          | 63 (1.2)          | 36 (0.7)          | 31 (0.6)          | 21 (0.4)        | 13 (0.2)          | 19 (0.3)          | 17 (0.3)          | 19 (0.3)          | 20 (0.3)          | 12 (0.2)          | 8 (0.1)           |
| <b>6B</b>                           | 30 (0.6)                                                                                                  | 29 (0.5)        | 26 (0.5)          | 19 (0.4)          | 24 (0.4)          | 15 (0.3)          | 16 (0.3)          | 7 (0.1)         | 7 (0.1)           | 7 (0.1)           | 3 (0.1)           | 1 (0)             | 8 (0.1)           | 2 (0)             | 4 (0.1)           |
| <b>9V</b>                           | 50 (0.9)                                                                                                  | 44 (0.8)        | 52 (1)            | 51 (0.9)          | 45 (0.8)          | 23 (0.4)          | 14 (0.3)          | 7 (0.1)         | 13 (0.2)          | 4 (0.1)           | 3 (0.1)           | 4 (0.1)           | 5 (0.1)           | 6 (0.1)           | 11 (0.2)          |
| <b>14</b>                           | 93 (1.8)                                                                                                  | 121 (2.3)       | 98 (1.8)          | 81 (1.5)          | 71 (1.3)          | 52 (0.9)          | 43 (0.8)          | 23 (0.4)        | 27 (0.5)          | 28 (0.5)          | 26 (0.4)          | 16 (0.3)          | 13 (0.2)          | 14 (0.2)          | 20 (0.3)          |
| <b>18C</b>                          | 19 (0.4)                                                                                                  | 24 (0.5)        | 30 (0.6)          | 22 (0.4)          | 15 (0.3)          | 21 (0.4)          | 14 (0.3)          | 9 (0.2)         | 7 (0.1)           | 11 (0.2)          | 4 (0.1)           | 3 (0.1)           | 1 (0)             | 6 (0.1)           | 7 (0.1)           |
| <b>19F</b>                          | 34 (0.6)                                                                                                  | 31 (0.6)        | 31 (0.6)          | 37 (0.7)          | 27 (0.5)          | 22 (0.4)          | 22 (0.4)          | 13 (0.2)        | 21 (0.4)          | 17 (0.3)          | 15 (0.3)          | 12 (0.2)          | 17 (0.3)          | 17 (0.3)          | 15 (0.2)          |
| <b>23F</b>                          | 33 (0.6)                                                                                                  | 44 (0.8)        | 51 (1)            | 58 (1.1)          | 53 (1)            | 23 (0.4)          | 24 (0.4)          | 21 (0.4)        | 12 (0.2)          | 7 (0.1)           | 7 (0.1)           | 3 (0.1)           | 3 (0.1)           | 2 (0)             | 2 (0)             |
| <b>1</b>                            | 31 (0.6)                                                                                                  | 28 (0.5)        | 25 (0.5)          | 35 (0.6)          | 32 (0.6)          | 42 (0.8)          | 27 (0.5)          | 29 (0.5)        | 19 (0.3)          | 21 (0.4)          | 4 (0.1)           | 4 (0.1)           | 3 (0.1)           | 0 (0)             | 1 (0)             |
| <b>3</b>                            | 84 (1.6)                                                                                                  | 75 (1.4)        | 91 (1.7)          | 111 (2)           | 133 (2.4)         | 94 (1.7)          | 115 (2.1)         | 90 (1.6)        | 125 (2.2)         | 96 (1.7)          | 103 (1.8)         | 123 (2.1)         | 120 (2)           | 140 (2.3)         | 124 (2.1)         |
| <b>6A</b>                           | 15 (0.3)                                                                                                  | 28 (0.5)        | 30 (0.6)          | 28 (0.6)          | 36 (0.7)          | 21 (0.4)          | 17 (0.3)          | 22 (0.4)        | 16 (0.3)          | 16 (0.3)          | 9 (0.2)           | 7 (0.1)           | 4 (0.1)           | 1 (0)             | 4 (0.1)           |
| <b>7F</b>                           | 65 (1.2)                                                                                                  | 56 (1.1)        | 73 (1.4)          | 71 (1.3)          | 88 (1.6)          | 75 (1.4)          | 80 (1.4)          | 68 (1.2)        | 74 (1.3)          | 36 (0.6)          | 32 (0.5)          | 21 (0.4)          | 19 (0.3)          | 7 (0.1)           | 5 (0.1)           |
| <b>19A</b>                          | 20 (0.4)                                                                                                  | 16 (0.3)        | 28 (0.5)          | 32 (0.6)          | 58 (1.1)          | 56 (1)            | 75 (1.3)          | 76 (1.3)        | 55 (1)            | 35 (0.6)          | 47 (0.8)          | 27 (0.5)          | 42 (0.7)          | 31 (0.5)          | 22 (0.4)          |
| <b>10A</b>                          | 0 (0)                                                                                                     | 0 (0)           | 1 (0)             | 1 (0)             | 0 (0)             | 6 (0.1)           | 8 (0.1)           | 9 (0.2)         | 14 (0.2)          | 10 (0.2)          | 16 (0.3)          | 17 (0.3)          | 17 (0.3)          | 15 (0.3)          | 18 (0.3)          |
| <b>11A</b>                          | 0 (0)                                                                                                     | 0 (0)           | 0 (0)             | 2 (0)             | 2 (0)             | 11 (0.2)          | 16 (0.3)          | 7 (0.1)         | 14 (0.2)          | 13 (0.2)          | 15 (0.3)          | 15 (0.3)          | 21 (0.4)          | 20 (0.3)          | 15 (0.2)          |
| <b>12F</b>                          | 0 (0)                                                                                                     | 0 (0)           | 3 (0.1)           | 11 (0.2)          | 4 (0.1)           | 5 (0.1)           | 7 (0.1)           | 10 (0.2)        | 11 (0.2)          | 17 (0.3)          | 16 (0.3)          | 16 (0.3)          | 18 (0.3)          | 32 (0.5)          | 39 (0.6)          |
| <b>15B/C</b>                        | 0 (0)                                                                                                     | 0 (0)           | 8 (0.1)           | 10 (0.2)          | 10 (0.2)          | 8 (0.1)           | 2 (0)             | 9 (0.2)         | 7 (0.1)           | 15 (0.3)          | 16 (0.3)          | 19 (0.3)          | 17 (0.3)          | 21 (0.4)          | 1 (0)             |
| <b>15A</b>                          | 0 (0)                                                                                                     | 0 (0)           | 0 (0)             | 7 (0.1)           | 1 (0)             | 2 (0)             | 4 (0.1)           | 2 (0)           | 8 (0.1)           | 15 (0.3)          | 16 (0.3)          | 13 (0.2)          | 24 (0.4)          | 17 (0.3)          | 14 (0.2)          |
| <b>22F</b>                          | 0 (0)                                                                                                     | 0 (0)           | 22 (0.4)          | 19 (0.4)          | 36 (0.7)          | 49 (0.9)          | 45 (0.8)          | 38 (0.7)        | 67 (1.2)          | 65 (1.1)          | 47 (0.8)          | 62 (1.1)          | 66 (1.1)          | 69 (1.2)          | 86 (1.4)          |
| <b>23A</b>                          | 0 (0)                                                                                                     | 0 (0)           | 2 (0)             | 8 (0.1)           | 7 (0.1)           | 5 (0.1)           | 6 (0.1)           | 9 (0.2)         | 11 (0.2)          | 18 (0.3)          | 15 (0.3)          | 8 (0.1)           | 19 (0.3)          | 16 (0.3)          | 20 (0.3)          |
| <b>23B</b>                          | 0 (0)                                                                                                     | 0 (0)           | 3 (0.1)           | 4 (0.1)           | 0 (0)             | 3 (0.1)           | 5 (0.1)           | 7 (0.1)         | 18 (0.3)          | 16 (0.3)          | 29 (0.5)          | 18 (0.3)          | 31 (0.5)          | 23 (0.4)          | 17 (0.3)          |
| <b>24</b>                           | 2 (0)                                                                                                     | 1 (0)           | 9 (0.2)           | 2 (0)             | 6 (0.1)           | 0 (0)             | 7 (0.1)           | 9 (0.2)         | 14 (0.2)          | 18 (0.3)          | 34 (0.6)          | 29 (0.5)          | 10 (0.2)          | 11 (0.2)          | 0 (0)             |
| <b>35F</b>                          | 0 (0)                                                                                                     | 0 (0)           | 4 (0.1)           | 6 (0.1)           | 6 (0.1)           | 12 (0.2)          | 4 (0.1)           | 10 (0.2)        | 11 (0.2)          | 8 (0.1)           | 11 (0.2)          | 12 (0.2)          | 9 (0.2)           | 13 (0.2)          | 13 (0.2)          |
| <b>6C</b>                           | 0 (0)                                                                                                     | 0 (0)           | 3 (0.1)           | 4 (0.1)           | 8 (0.1)           | 14 (0.3)          | 14 (0.3)          | 12 (0.2)        | 25 (0.4)          | 9 (0.2)           | 20 (0.3)          | 12 (0.2)          | 19 (0.3)          | 12 (0.2)          | 8 (0.1)           |
| <b>8</b>                            | 35 (0.7)                                                                                                  | 36 (0.7)        | 20 (0.4)          | 31 (0.6)          | 34 (0.6)          | 30 (0.5)          | 39 (0.7)          | 27 (0.5)        | 47 (0.8)          | 41 (0.7)          | 63 (1.1)          | 69 (1.2)          | 104 (1.8)         | 109 (1.8)         | 101 (1.7)         |
| <b>9N</b>                           | 0 (0)                                                                                                     | 0 (0)           | 22 (0.4)          | 36 (0.7)          | 19 (0.3)          | 19 (0.3)          | 25 (0.4)          | 24 (0.4)        | 22 (0.4)          | 23 (0.4)          | 23 (0.4)          | 39 (0.7)          | 50 (0.8)          | 37 (0.6)          | 53 (0.9)          |
| <b>others<sup>c</sup></b>           | 126 (2.4)                                                                                                 | 105 (2)         | 62 (1.2)          | 72 (1.3)          | 79 (1.4)          | 54 (1)            | 49 (0.9)          | 59 (1)          | 55 (1)            | 66 (1.1)          | 73 (1.3)          | 57 (1)            | 79 (1.3)          | 78 (1.3)          | 87 (1.4)          |
| <b>Total*</b>                       | <b>694 (13.2)</b>                                                                                         | <b>687 (13)</b> | <b>741 (13.8)</b> | <b>817 (15.1)</b> | <b>857 (15.7)</b> | <b>698 (12.6)</b> | <b>709 (12.7)</b> | <b>618 (11)</b> | <b>713 (12.5)</b> | <b>631 (10.9)</b> | <b>664 (11.4)</b> | <b>626 (10.6)</b> | <b>739 (12.5)</b> | <b>711 (11.9)</b> | <b>695 (11.5)</b> |

a Serotypes/serogroups with proportions ≥1% are highlighted as such: PCV7 in peach, additional serotypes included in PCV13, but not PCV7 are in blue and non-PCV serotypes are in gray.

b East region defined as primarily German speaking cantons in Switzerland.

c Serotypes/serogroups with proportions <1% were classified as others irrespective of PCV type.

\* Excludes 13 isolates/cases with unknown regional classification

Table S7. Incidence of serotypes among IPD cases in western Switzerland, 2005-2019

| Serotype/<br>serogroup <sup>a</sup> | Incidence of serotypes/serogroups among IPD cases in the West <sup>b</sup> (Cases per 100'000 population) |                 |                   |                   |                   |                   |                   |                   |                   |                  |                |                  |                   |                |                  |
|-------------------------------------|-----------------------------------------------------------------------------------------------------------|-----------------|-------------------|-------------------|-------------------|-------------------|-------------------|-------------------|-------------------|------------------|----------------|------------------|-------------------|----------------|------------------|
|                                     | Year                                                                                                      |                 |                   |                   |                   |                   |                   |                   |                   |                  |                |                  |                   |                |                  |
|                                     | 2005                                                                                                      | 2006            | 2007              | 2008              | 2009              | 2010              | 2011              | 2012              | 2013              | 2014             | 2015           | 2016             | 2017              | 2018           | 2019             |
| <b>4</b>                            | 20 (0.9)                                                                                                  | 32 (1.4)        | 20 (0.9)          | 20 (0.9)          | 16 (0.7)          | 15 (0.6)          | 17 (0.7)          | 11 (0.5)          | 14 (0.6)          | 2 (0.1)          | 1 (0)          | 0 (0)            | 1 (0)             | 1 (0)          | 0 (0)            |
| <b>6B</b>                           | 18 (0.8)                                                                                                  | 9 (0.4)         | 6 (0.3)           | 7 (0.3)           | 3 (0.1)           | 1 (0)             | 6 (0.3)           | 4 (0.2)           | 0 (0)             | 0 (0)            | 1 (0)          | 4 (0.2)          | 1 (0)             | 2 (0.1)        | 0 (0)            |
| <b>9V</b>                           | 23 (1.1)                                                                                                  | 13 (0.6)        | 25 (1.1)          | 17 (0.7)          | 13 (0.6)          | 6 (0.3)           | 5 (0.2)           | 6 (0.3)           | 6 (0.2)           | 2 (0.1)          | 4 (0.2)        | 3 (0.1)          | 1 (0)             | 2 (0.1)        | 1 (0)            |
| <b>14</b>                           | 43 (2)                                                                                                    | 30 (1.4)        | 44 (2)            | 30 (1.3)          | 17 (0.7)          | 14 (0.6)          | 13 (0.5)          | 7 (0.3)           | 12 (0.5)          | 9 (0.4)          | 3 (0.1)        | 3 (0.1)          | 4 (0.2)           | 5 (0.2)        | 2 (0.1)          |
| <b>18C</b>                          | 6 (0.3)                                                                                                   | 11 (0.5)        | 9 (0.4)           | 8 (0.4)           | 4 (0.2)           | 2 (0.1)           | 3 (0.1)           | 1 (0)             | 2 (0.1)           | 1 (0)            | 0 (0)          | 1 (0)            | 0 (0)             | 0 (0)          | 1 (0)            |
| <b>19F</b>                          | 10 (0.5)                                                                                                  | 18 (0.8)        | 19 (0.8)          | 11 (0.5)          | 7 (0.3)           | 7 (0.3)           | 7 (0.3)           | 4 (0.2)           | 6 (0.2)           | 4 (0.2)          | 1 (0)          | 8 (0.3)          | 10 (0.4)          | 1 (0)          | 8 (0.3)          |
| <b>23F</b>                          | 28 (1.3)                                                                                                  | 15 (0.7)        | 9 (0.4)           | 15 (0.7)          | 8 (0.3)           | 5 (0.2)           | 4 (0.2)           | 10 (0.4)          | 1 (0)             | 2 (0.1)          | 3 (0.1)        | 0 (0)            | 1 (0)             | 3 (0.1)        | 0 (0)            |
| <b>1</b>                            | 29 (1.3)                                                                                                  | 12 (0.5)        | 12 (0.5)          | 15 (0.7)          | 17 (0.7)          | 15 (0.6)          | 22 (0.9)          | 12 (0.5)          | 7 (0.3)           | 3 (0.1)          | 2 (0.1)        | 1 (0)            | 0 (0)             | 0 (0)          | 0 (0)            |
| <b>3</b>                            | 37 (1.7)                                                                                                  | 32 (1.4)        | 44 (2)            | 40 (1.8)          | 29 (1.3)          | 32 (1.4)          | 53 (2.2)          | 47 (2)            | 38 (1.6)          | 35 (1.4)         | 48 (1.9)       | 40 (1.6)         | 38 (1.5)          | 47 (1.8)       | 24 (0.9)         |
| <b>6A</b>                           | 5 (0.2)                                                                                                   | 12 (0.5)        | 6 (0.3)           | 9 (0.4)           | 9 (0.4)           | 9 (0.4)           | 3 (0.1)           | 2 (0.1)           | 2 (0.1)           | 2 (0.1)          | 2 (0.1)        | 0 (0)            | 1 (0)             | 3 (0.1)        | 0 (0)            |
| <b>7F</b>                           | 18 (0.8)                                                                                                  | 23 (1)          | 25 (1.1)          | 28 (1.2)          | 27 (1.2)          | 34 (1.5)          | 26 (1.1)          | 31 (1.3)          | 22 (0.9)          | 7 (0.3)          | 5 (0.2)        | 5 (0.2)          | 3 (0.1)           | 2 (0.1)        | 1 (0)            |
| <b>19A</b>                          | 10 (0.5)                                                                                                  | 8 (0.4)         | 15 (0.7)          | 17 (0.7)          | 21 (0.9)          | 43 (1.8)          | 41 (1.7)          | 43 (1.8)          | 27 (1.1)          | 15 (0.6)         | 19 (0.8)       | 19 (0.8)         | 21 (0.8)          | 11 (0.4)       | 8 (0.3)          |
| <b>10A</b>                          | 0 (0)                                                                                                     | 0 (0)           | 0 (0)             | 0 (0)             | 1 (0)             | 3 (0.1)           | 8 (0.3)           | 6 (0.3)           | 5 (0.2)           | 10 (0.4)         | 6 (0.2)        | 6 (0.2)          | 7 (0.3)           | 10 (0.4)       | 12 (0.5)         |
| <b>11</b>                           | 5 (0.2)                                                                                                   | 8 (0.4)         | 6 (0.3)           | 13 (0.6)          | 6 (0.3)           | 2 (0.1)           | 1 (0)             | 0 (0)             | 0 (0)             | 0 (0)            | 0 (0)          | 0 (0)            | 0 (0)             | 0 (0)          | 0 (0)            |
| <b>11A</b>                          | 0 (0)                                                                                                     | 0 (0)           | 0 (0)             | 1 (0)             | 0 (0)             | 2 (0.1)           | 7 (0.3)           | 8 (0.3)           | 4 (0.2)           | 12 (0.5)         | 7 (0.3)        | 5 (0.2)          | 6 (0.2)           | 4 (0.2)        | 3 (0.1)          |
| <b>12F</b>                          | 0 (0)                                                                                                     | 0 (0)           | 0 (0)             | 0 (0)             | 5 (0.2)           | 0 (0)             | 1 (0)             | 6 (0.3)           | 6 (0.2)           | 2 (0.1)          | 5 (0.2)        | 9 (0.4)          | 11 (0.4)          | 5 (0.2)        | 9 (0.3)          |
| <b>15B/C</b>                        | 0 (0)                                                                                                     | 1 (0)           | 3 (0.1)           | 0 (0)             | 5 (0.2)           | 6 (0.3)           | 9 (0.4)           | 8 (0.3)           | 6 (0.2)           | 5 (0.2)          | 3 (0.1)        | 4 (0.2)          | 7 (0.3)           | 4 (0.2)        | 0 (0)            |
| <b>15A</b>                          | 0 (0)                                                                                                     | 0 (0)           | 0 (0)             | 2 (0.1)           | 4 (0.2)           | 3 (0.1)           | 6 (0.3)           | 6 (0.3)           | 2 (0.1)           | 5 (0.2)          | 4 (0.2)        | 11 (0.4)         | 7 (0.3)           | 10 (0.4)       | 15 (0.6)         |
| <b>20</b>                           | 0 (0)                                                                                                     | 2 (0.1)         | 2 (0.1)           | 6 (0.3)           | 2 (0.1)           | 0 (0)             | 2 (0.1)           | 1 (0)             | 2 (0.1)           | 2 (0.1)          | 6 (0.2)        | 6 (0.2)          | 8 (0.3)           | 4 (0.2)        | 7 (0.3)          |
| <b>22F</b>                          | 0 (0)                                                                                                     | 0 (0)           | 8 (0.4)           | 14 (0.6)          | 9 (0.4)           | 12 (0.5)          | 17 (0.7)          | 16 (0.7)          | 18 (0.7)          | 27 (1.1)         | 19 (0.8)       | 23 (0.9)         | 25 (1)            | 17 (0.7)       | 16 (0.6)         |
| <b>23A</b>                          | 0 (0)                                                                                                     | 1 (0)           | 2 (0.1)           | 3 (0.1)           | 5 (0.2)           | 3 (0.1)           | 5 (0.2)           | 2 (0.1)           | 6 (0.2)           | 6 (0.2)          | 4 (0.2)        | 8 (0.3)          | 8 (0.3)           | 4 (0.2)        | 9 (0.3)          |
| <b>23B</b>                          | 0 (0)                                                                                                     | 0 (0)           | 1 (0)             | 2 (0.1)           | 3 (0.1)           | 5 (0.2)           | 3 (0.1)           | 6 (0.3)           | 5 (0.2)           | 6 (0.2)          | 4 (0.2)        | 2 (0.1)          | 8 (0.3)           | 10 (0.4)       | 6 (0.2)          |
| <b>24</b>                           | 0 (0)                                                                                                     | 0 (0)           | 1 (0)             | 3 (0.1)           | 3 (0.1)           | 3 (0.1)           | 0 (0)             | 6 (0.3)           | 8 (0.3)           | 7 (0.3)          | 8 (0.3)        | 2 (0.1)          | 5 (0.2)           | 2 (0.1)        | 0 (0)            |
| <b>35F</b>                          | 0 (0)                                                                                                     | 0 (0)           | 2 (0.1)           | 1 (0)             | 2 (0.1)           | 5 (0.2)           | 0 (0)             | 5 (0.2)           | 7 (0.3)           | 6 (0.2)          | 9 (0.4)        | 4 (0.2)          | 6 (0.2)           | 3 (0.1)        | 7 (0.3)          |
| <b>6C</b>                           | 0 (0)                                                                                                     | 0 (0)           | 1 (0)             | 4 (0.2)           | 4 (0.2)           | 7 (0.3)           | 9 (0.4)           | 4 (0.2)           | 15 (0.6)          | 1 (0)            | 6 (0.2)        | 8 (0.3)          | 3 (0.1)           | 3 (0.1)        | 5 (0.2)          |
| <b>8</b>                            | 22 (1)                                                                                                    | 21 (0.9)        | 12 (0.5)          | 19 (0.8)          | 17 (0.7)          | 15 (0.6)          | 21 (0.9)          | 26 (1.1)          | 19 (0.8)          | 19 (0.8)         | 26 (1)         | 38 (1.5)         | 46 (1.8)          | 50 (1.9)       | 41 (1.6)         |
| <b>9N</b>                           | 0 (0)                                                                                                     | 0 (0)           | 5 (0.2)           | 5 (0.2)           | 7 (0.3)           | 13 (0.6)          | 7 (0.3)           | 9 (0.4)           | 9 (0.4)           | 8 (0.3)          | 9 (0.4)        | 16 (0.6)         | 14 (0.5)          | 13 (0.5)       | 10 (0.4)         |
| <b>others<sup>c</sup></b>           | 48 (2.2)                                                                                                  | 40 (1.8)        | 19 (0.8)          | 21 (0.9)          | 26 (1.1)          | 21 (0.9)          | 15 (0.6)          | 19 (0.8)          | 23 (0.9)          | 17 (0.7)         | 20 (0.8)       | 25 (1)           | 31 (1.2)          | 15 (0.6)       | 28 (1.1)         |
| <b>Total*</b>                       | <b>322 (14.7)</b>                                                                                         | <b>288 (13)</b> | <b>296 (13.2)</b> | <b>311 (13.6)</b> | <b>270 (11.7)</b> | <b>283 (12.1)</b> | <b>311 (13.1)</b> | <b>306 (12.8)</b> | <b>272 (11.2)</b> | <b>215 (8.7)</b> | <b>225 (9)</b> | <b>251 (9.9)</b> | <b>273 (10.7)</b> | <b>231 (9)</b> | <b>213 (8.3)</b> |

a Serotypes/serogroups with proportions ≥1% are highlighted as such: PCV7 in peach, additional serotypes included in PCV13, but not PCV7 are in blue and non-PCV serotypes are in gray.

b West region defined as primarily French and Italian speaking cantons in Switzerland.

c Serotypes/serogroups with proportions <1% were classified as others irrespective of PCV type.

\* Excludes 13 isolates/cases with unknown regional classification.

Supplementary Figures

Figure S1. Cantons of Switzerland and their regional classification

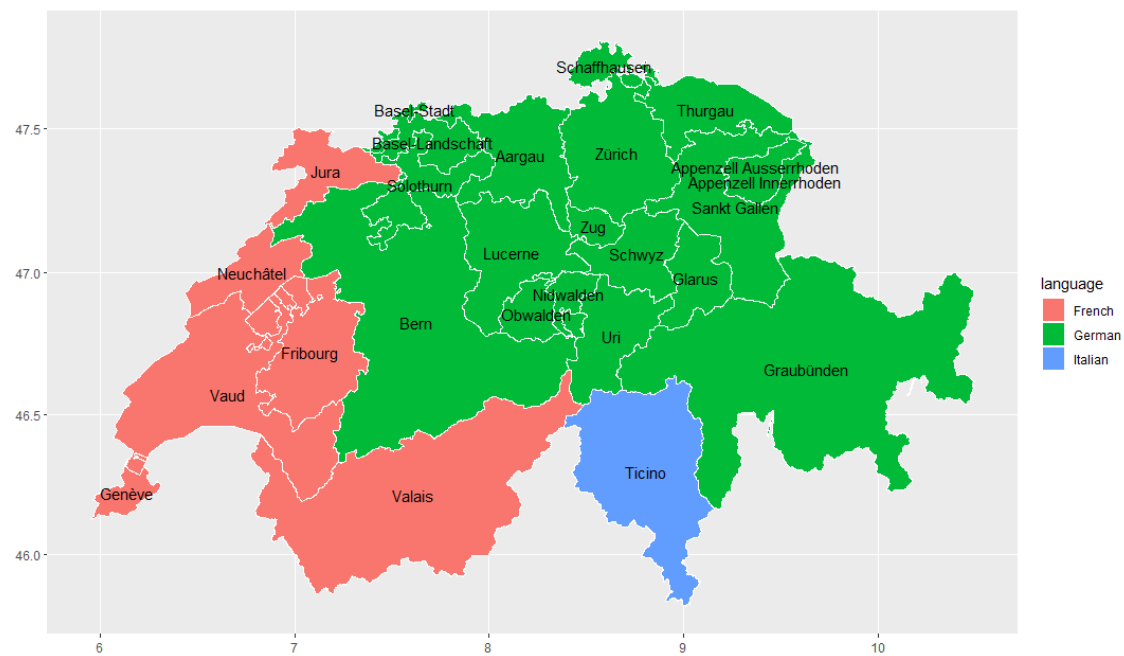

| Canton(s)                                                                                                                                                                                                                                                                                                            | Majority Language | Regional classification |
|----------------------------------------------------------------------------------------------------------------------------------------------------------------------------------------------------------------------------------------------------------------------------------------------------------------------|-------------------|-------------------------|
| Ticino (TI)                                                                                                                                                                                                                                                                                                          | Italian           | West                    |
| Fribourg (FR), Geneva (GE), Jura (JU), Neuchâtel (NE), Valais (VS), Vaud (VD)                                                                                                                                                                                                                                        | French            | West                    |
| Aargau (AG), Appenzell Ausserrhoden (AR), Appenzell Innerrhoden (AI), Basel-Landschaft (BL), Basel-Stadt (BS), Bern (BE), Glarus (GL), Graubünden (GR), Lucerne (LU), Nidwalden (NW), Obwalden (OW), Schaffhausen (SH), Schwyz (SZ), Solothurn (SO), St. Gallen (SG), Thurgau (TG), Uri (UR), Zug (ZG), Zürich (ZH). | German            | East                    |



Figure S2. Regional estimates of pneumococcal vaccine coverage in children aged 2-years and age-group specific IPD incidence in Switzerland, 2005-2019. (A) regional estimates with up to 1 PCV dose and (B) up to 3 PCV doses.

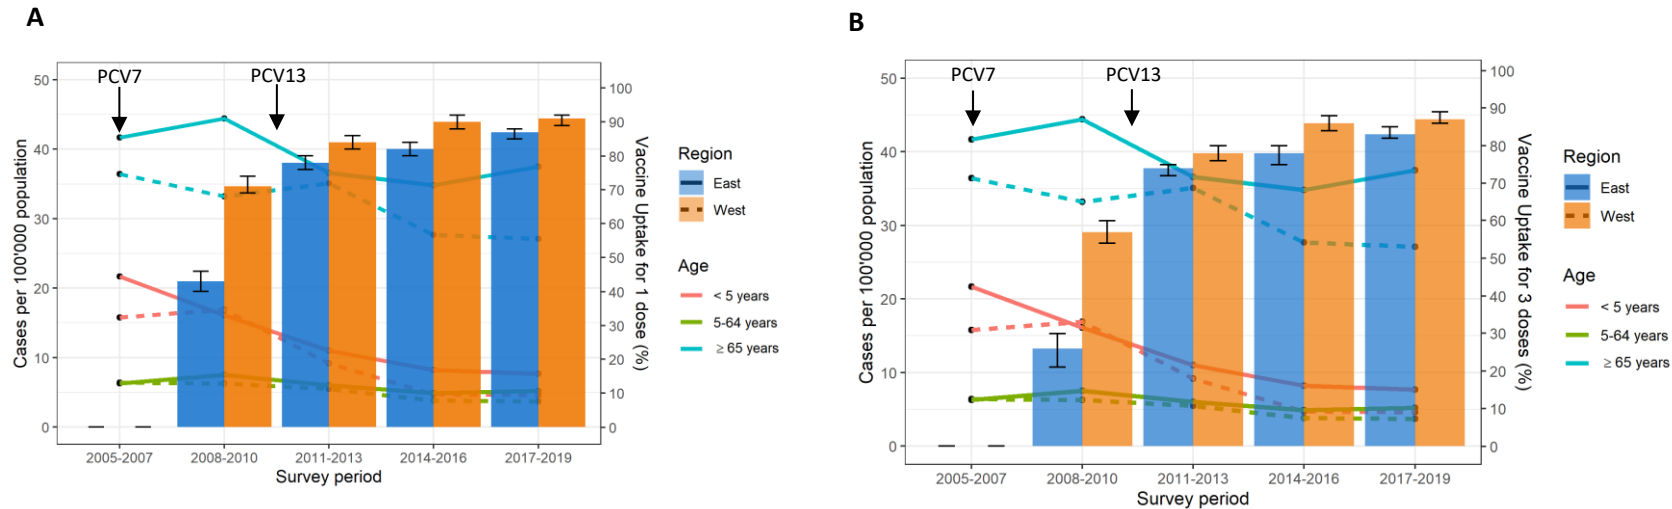

Figure S3. Timeliness of pneumococcal conjugate vaccine uptake in children aged 8 years old in Switzerland and its regions, 2014-2019.

(A) Timeliness of vaccine uptake in children aged 8 years vaccinated with 1-3 doses of PCV7 or PCV13, (B) regional estimates of pneumococcal vaccination coverage among children 8 years with up to 1 PCV dose, (C) up to 2 PCV doses and (D) up to 3 PCV doses.

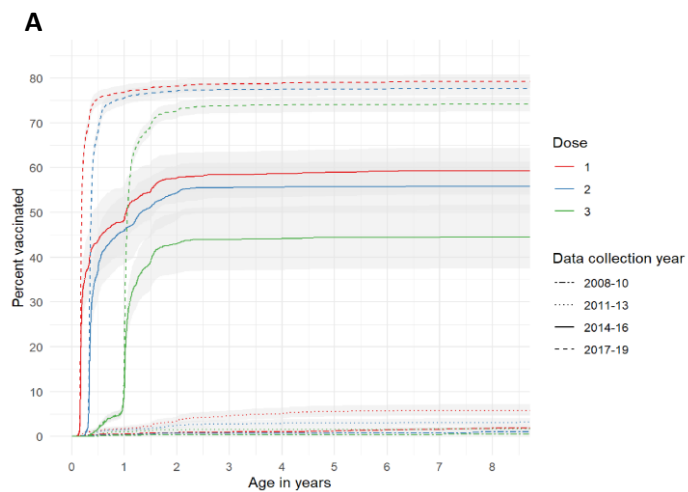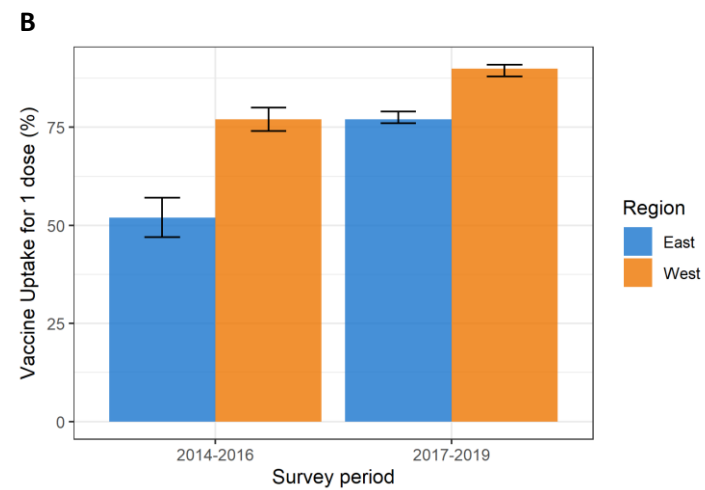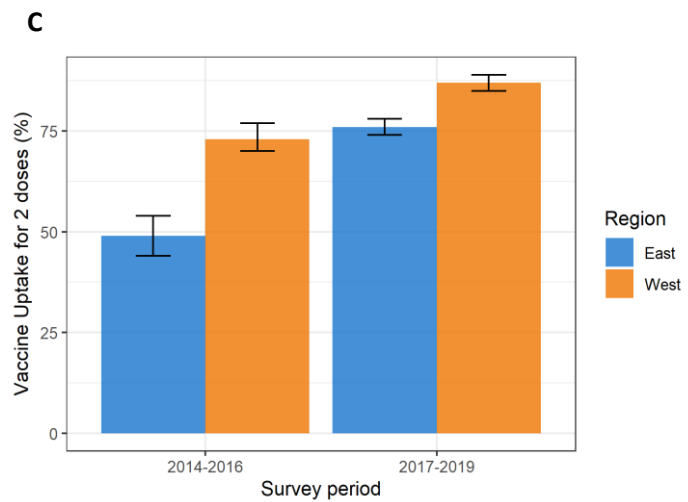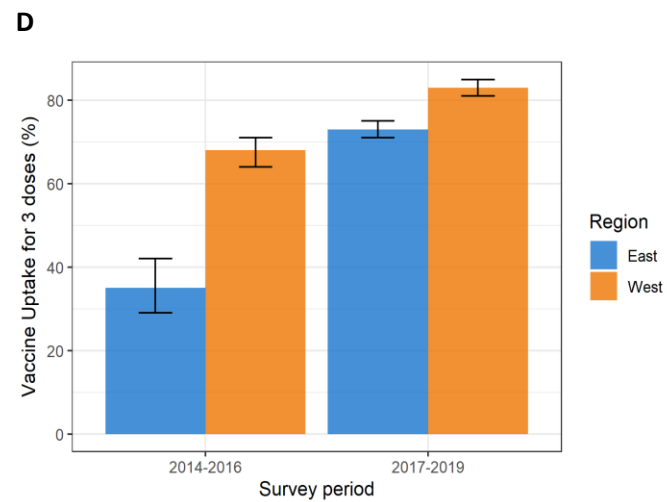

Supplement: s1 [file s1]
